# Supplementary material for: A perinuclear α-helix with amphipathic features in Brl1 promotes NPC assembly
Source: PubMed Central journal article supplement — Mol Biol Cell. 2022 Apr 14;33(5):ar35. doi: 10.1091/mbc.E21-12-0616 (PMC9282021; doi:10.1091/mbc.e21-12-0616), 2022-04-14
Supplement: mbc-33-ar35-s001.pdf [file mbc-33-ar35-s001.pdf]

# Supplementary Materials

*Molecular Biology of the Cell*

Vitale *et al.*

## Supplementary Figures

**Supplementary Figure 1.** Domain organization of Br11 like proteins from the indicated organisms. Predictions from the AlphaFold Protein Structure Database show that AαH and DAH are conserved in these Br11/Brr6 like proteins (left). Heliquest predictions for the AαH in the perinuclear space are shown on the right (Gautier *et al.*, 2008). (A) *Saccharomyces cerevisiae* - BRR6. (B) *Saccharomyces pombe* - brr6. (C) *Candida albicans* - brr6 like C-C domain containing protein. (D) *Plasmodium falciparum* - BRR6.

**Supplementary Figure 2.** Role of AαH and DAH for the function of Br11 and the BRL1 overexpression phenotype. (A) Domain organization of Br11 with the analyzed mutations in the DAH (enlargement on top). Conserved (blue) and not conserved (red) amino acids and the introduced amino acid changes (Supplementary Figure S2B-D) are indicated (Gardner *et al.*, 2021). (B) Growth test of *BRL1* and indicated *BRL1* mutants using a plasmid shuffle approach. 10-fold serial dilutions were spotted onto SC-Leu and 5-FOA plates that were incubated at the indicated temperatures. (C) Cells with the indicated  $P_{Gal1}$  plasmids were grown on glucose (Glu) and galactose/raffinose (Gal/Raf) plates at 30°C for 2 days.  $P_{Gal1}$ -*brl1*<sup>F391P</sup> and the combination of  $P_{Gal1}$ -*brl1*<sup>F391E</sup>  $P_{DAH}$  cells showed the same toxicity of  $P_{Gal1}$ -*brl1*<sup>F391E</sup> upon promoter induction. Slight toxic effect was observed for  $P_{Gal1}$ -*brl1*<sup>C347Y</sup> and  $P_{Gal1}$ -*brl1*<sup>C365S C371S</sup> overexpression. (D) Microscopic analysis of cells carrying dsRED-HDEL and the indicated  $P_{Gal1}$  plasmids. Cells were grown in raffinose overnight followed by the addition of galactose for 3 h at 30°C to induce  $P_{Gal1}$ . Scale bar: 3 μm. (E, F)  $P_{Gal1}$ -*brl1*<sup>F391E</sup> was induced for 3-5 h by the addition of galactose to cells grown in raffinose medium at 30°C. (E) Morphology of petals attached with the NE. (F) Petals that detached from the NE. Scale bars: 400 nm.

**Supplementary Figure 3.** Overexpression toxicity of  $P_{Gal1}$ -*brl1*<sup>F391E</sup> is not dependent on *APQ12*, *BRR6* or *NUP116*. (A-C) WT, *apq12Δ*, *apq12-ah* cells (A), *brr6-751* cells (C) and *nup116Δ* cells with the indicated  $P_{Gal1}$  plasmids were grown on glucose (Glu) and galactose/raffinose (Gal/Raf) plates at 30°C for 2 days.

**Supplementary Figure 4.** NPC phenotype of  $P_{Gal1}$ -*brl1*<sup>F391E</sup> cells with and without induction of the  $P_{Gal1}$  promoter. (A) *NUP159-tdTomato*, *NSP1-tdTomato*, *NUP82-tdTomato* and *NUP42-tdTomato* cells with *yeGFP*, *BRL1-yeGFP* or *brl1*<sup>F391E</sup>-*yeGFP* under control of the  $P_{Gal1}$  promoter grown in raffinose medium at 30°C. Scale bar: 5 μm. (B) Line scan of the NE of enlarged cells shown in Figure 4B (*NUP159-tdTomato*, *NSP1-tdTomato*, *NUP82-tdTomato*) and Figure 4C (*NUP42-tdTomato*). (C) Distribution of *Nup159-yeGFP* and *Nup82-tdTomato* carrying  $P_{Gal1}$ ,  $P_{Gal1}$ -*BRL1* or  $P_{Gal1}$ -*brl1*<sup>F391E</sup> under control of the  $P_{Gal1}$  promoter grown in raffinose medium at 30°C. Line scans on the bottom show distribution of the *yeGFP* and *tdTomato* signals. The yellow asterisk (\*) corresponds to the enlarged cell on the right used for the scan analysis of the NE. *NUP159-yeGFP* *NUP82-tdTomato* cells under  $P_{Gal1}$  promoter induction condition (3 h) are shown in Figure 4E. Scale bar: 5 μm.

**Supplementary Figure 5.** Impact of  $P_{Gal1}$ -*brl1*<sup>F391E</sup>-*yeGFP* overexpression on *Nup133*, *Nup84*, and *Nup116*. (A) *NUP133-tdTomato*, *NUP84-tdTomato* and *NUP116-tdTomato* cells with *yeGFP*, *BRL1-yeGFP* or *brl1*<sup>F391E</sup>-*yeGFP* under control of the  $P_{Gal1}$  promoter grown in raffinose/galactose medium at 30°C for 0 h and 3 h.

Line scans of tdTomato signal along the NE are shown on the right. (B) *NUP159-yeGFP NUP116-tdTomato* cells with  $P_{Gal1}$ ,  $P_{Gal1-BRL1}$  or  $P_{Gal1-brl1}^{F391E}$  grown in raffinose/galactose medium at 30°C for 0 h and 3 h. The yellow asterisk (\*) indicates the cell used for the line scan analysis of yeGFP and tdTomato signal along the NE. The interested cell is showed enlarged on the right. (A, B) Scale bars: 5  $\mu$ m.

**Supplementary Figure 6.** SIM analysis. Impact of  $P_{Gal1-BRL1}$   $P_{Gal1-brl1}^{F391E}$  overexpression on Nup159, Nup82, Nsp1, Nup42 tagged with tdTomato fixed with 4% PFA and 2% Sucrose and analysed with SIM super resolution microscopy. Scale bars: 2  $\mu$ m.

**Supplementary Figure 7.** Core NPC assembly is not affected by  $P_{Gal1-brl1}^{F391E}$  overexpression. (A) Experimental outline of RITE assay. (B) Estradiol induces a Cre-induced recombination switch of *NUP188-mCherry* (old) to *NUP188-yeGFP* (new).  $P_{Gal1}$ ,  $P_{Gal1-BRL1}$  and  $P_{Gal1-brl1}^{F391E}$  cells carrying the NUP188mCherry-yeGFP RITE construct were grown for 2 h in the presence of galactose and estradiol at 30°C. Cells were analysed by fluorescence microscopy. Scale bar: 5  $\mu$ m.

**Supplementary Figure 8.** Immuno-EM control and MAB414 analysis of  $P_{Gal1-brl1}^{F391E}$  cells by immuno-EM. (A) WT cells not expressing yeGFP were incubated with anti-GFP antibodies followed by Protein A-gold (15 nm). No gold staining was observed in 10 inspected yeast cells. Two representative cells are shown. Scale bar: 200 nm. (B) MAB414 staining of  $P_{Gal1-brl1}^{F391E}$  cells. Cells overexpressing  $P_{Gal1-brl1}^{F391E}$  for 3 h were fixed and then incubated with MAB414 followed by Protein A-gold (15 nm). Cells were analysed by EM. Scale bar: (top panel) 200 nm, (bottom panel) 500 nm, enlargements; 200 nm.

A

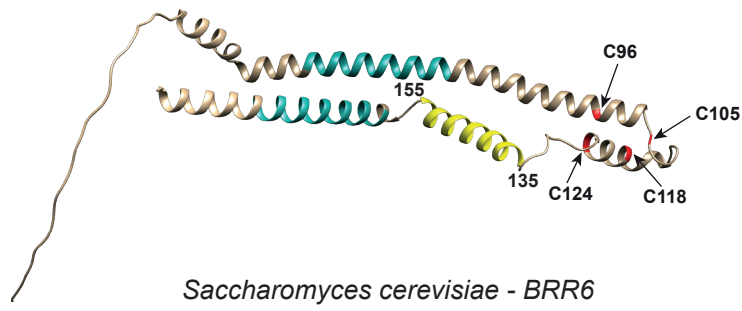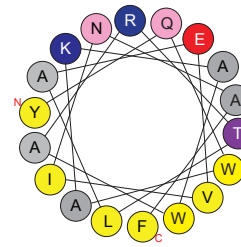

B

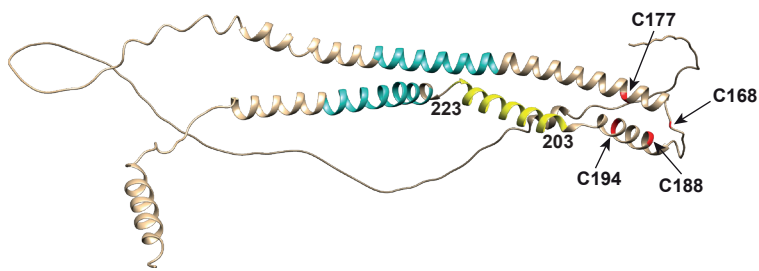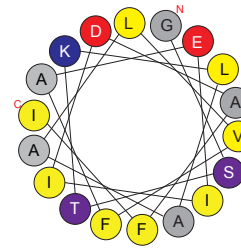

C

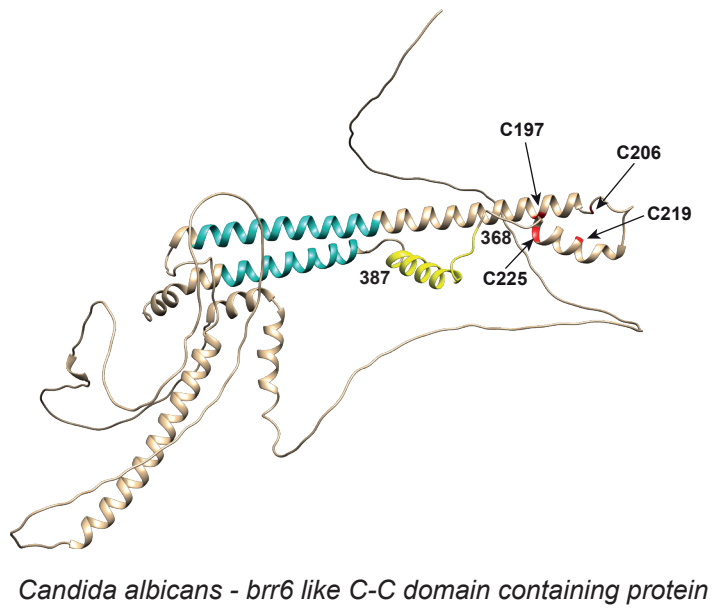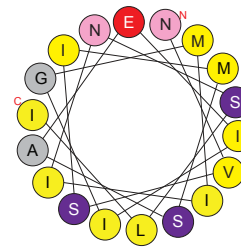

D

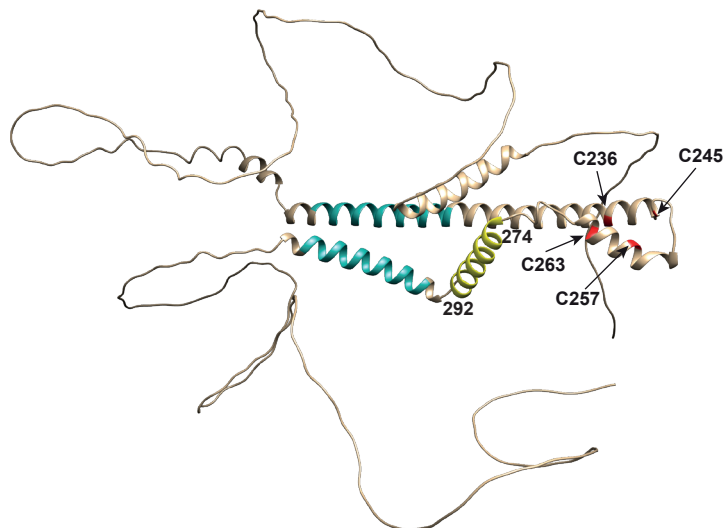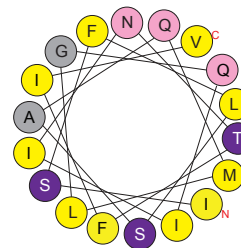

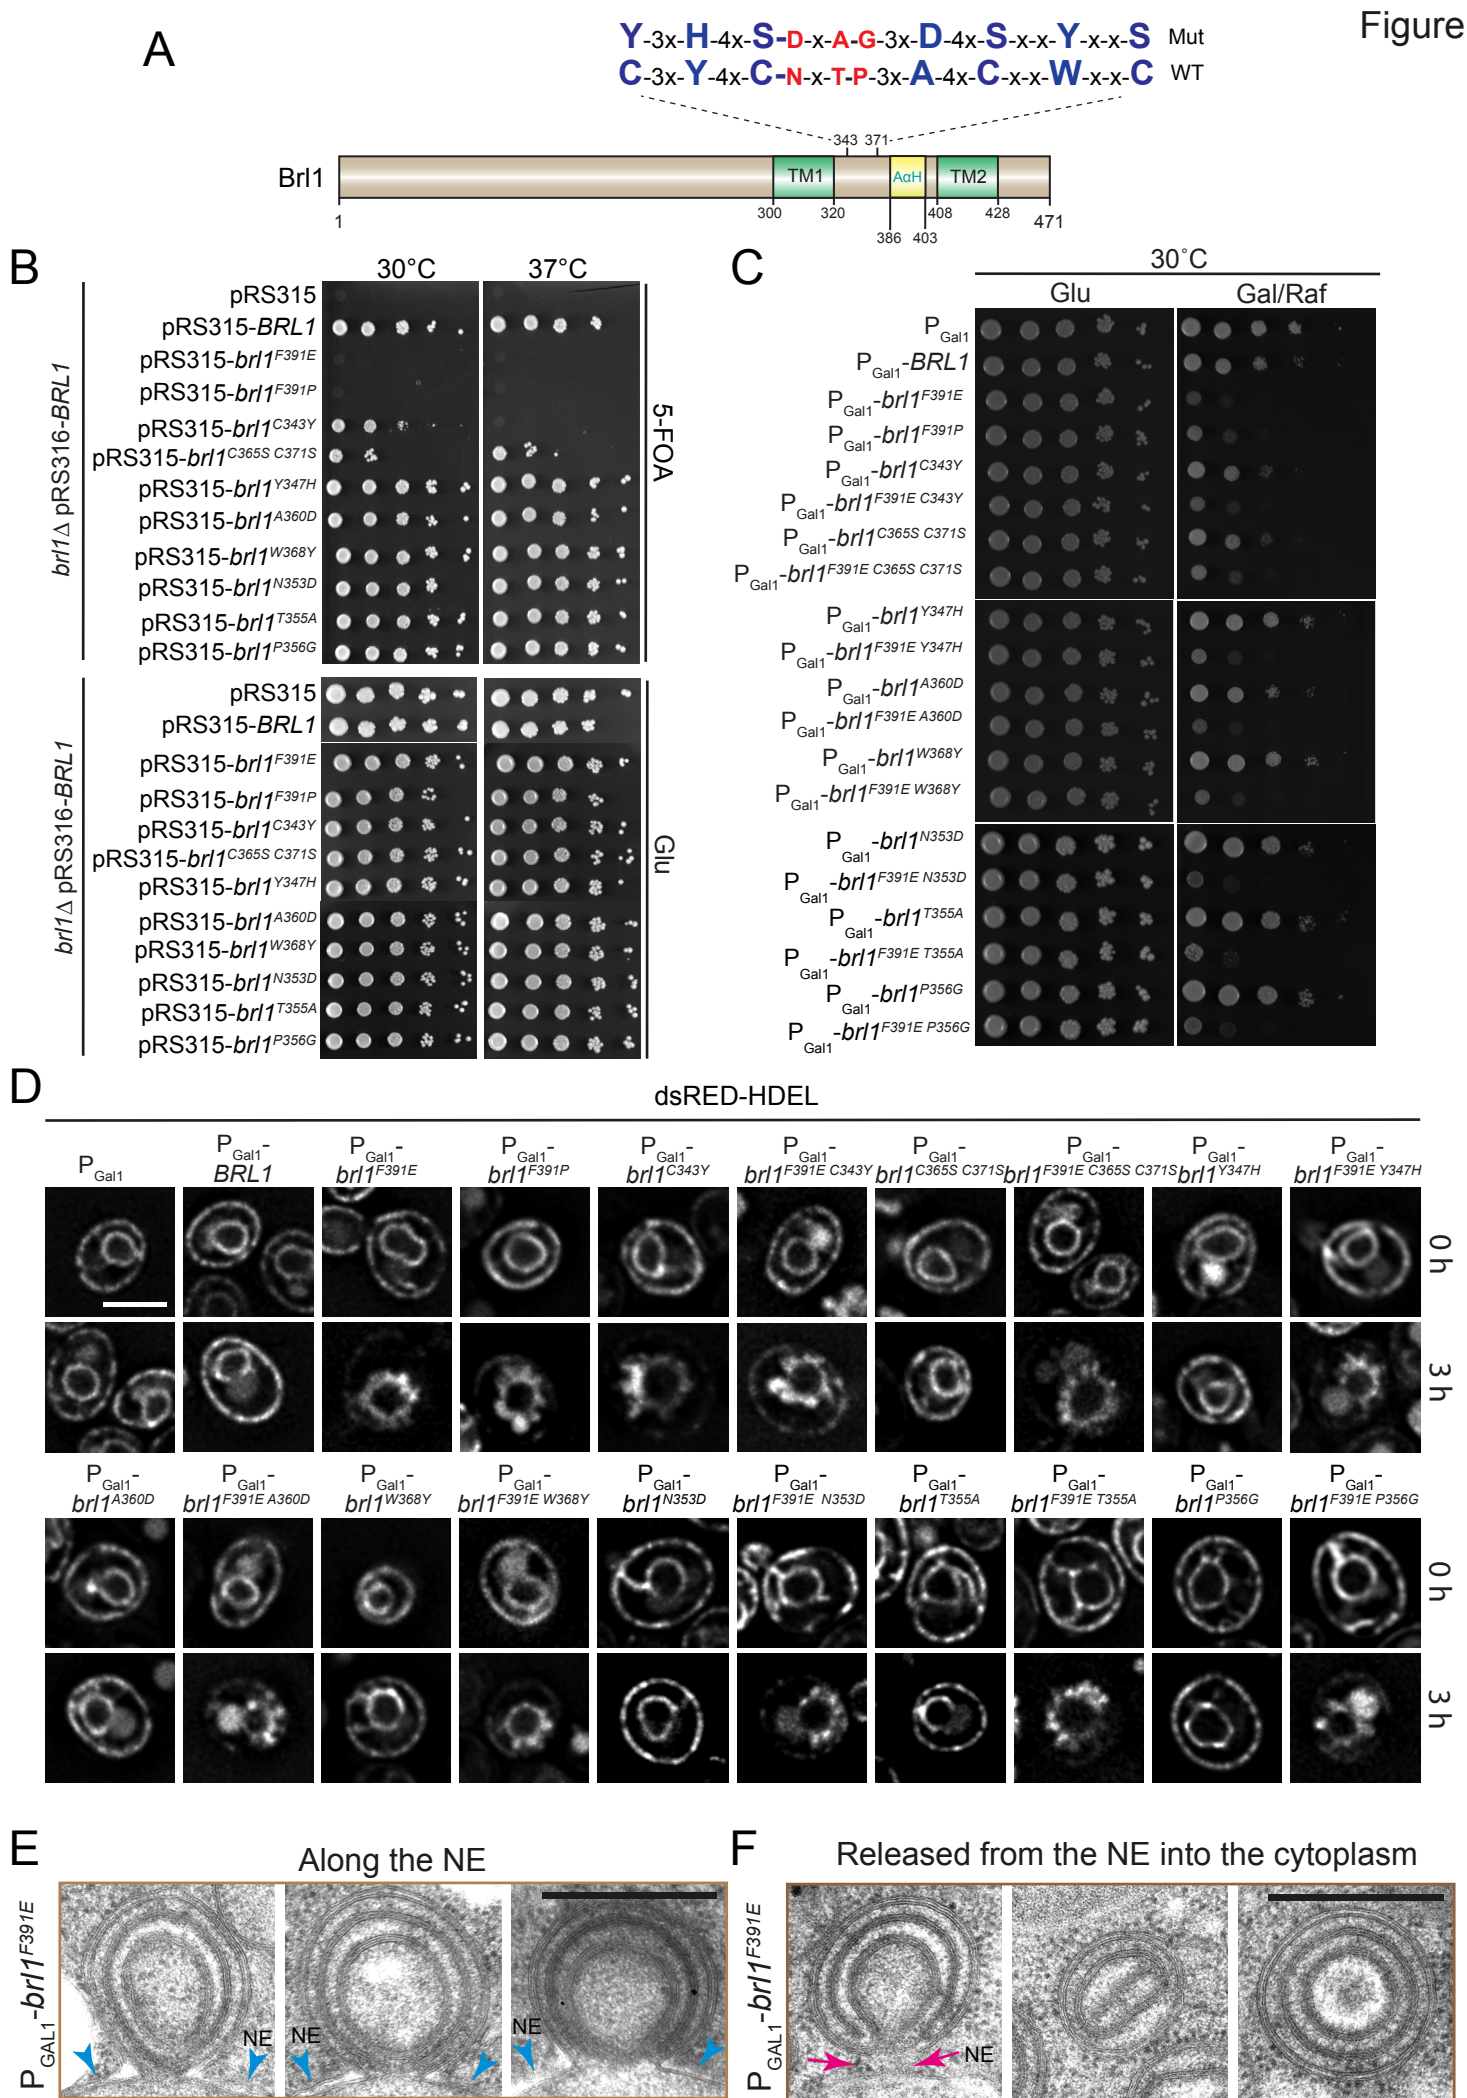

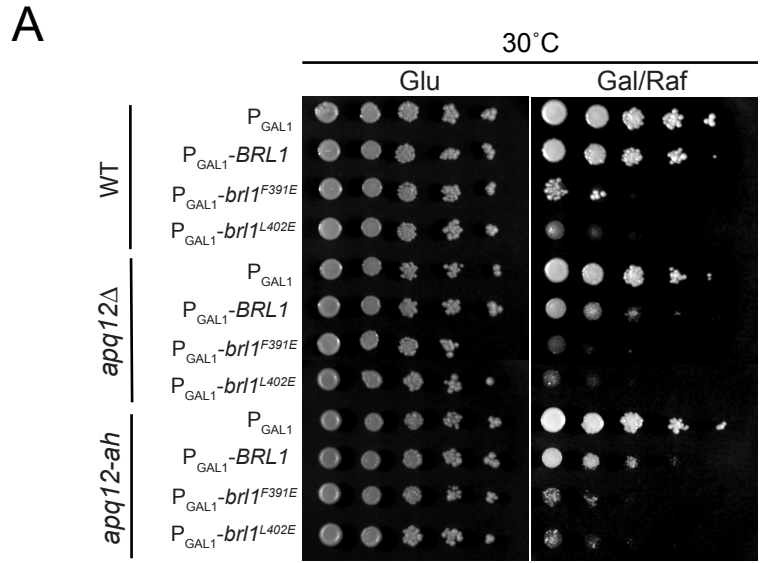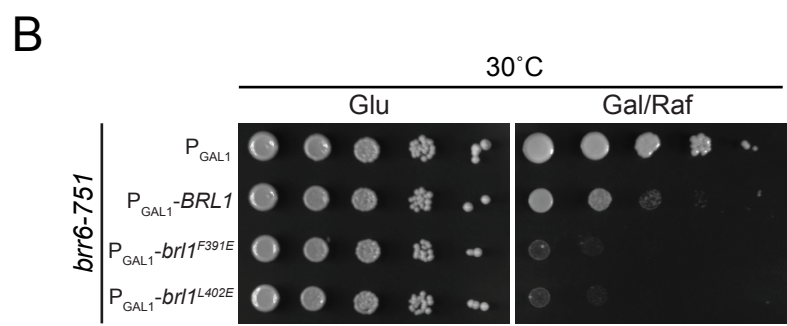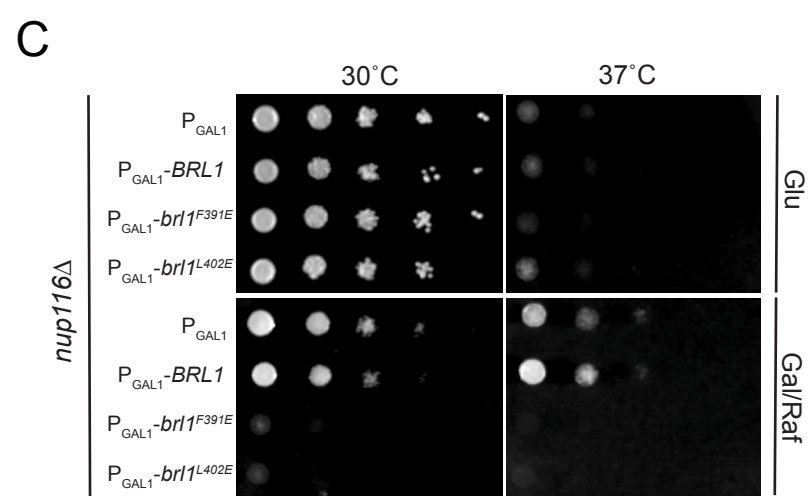

A

0 h

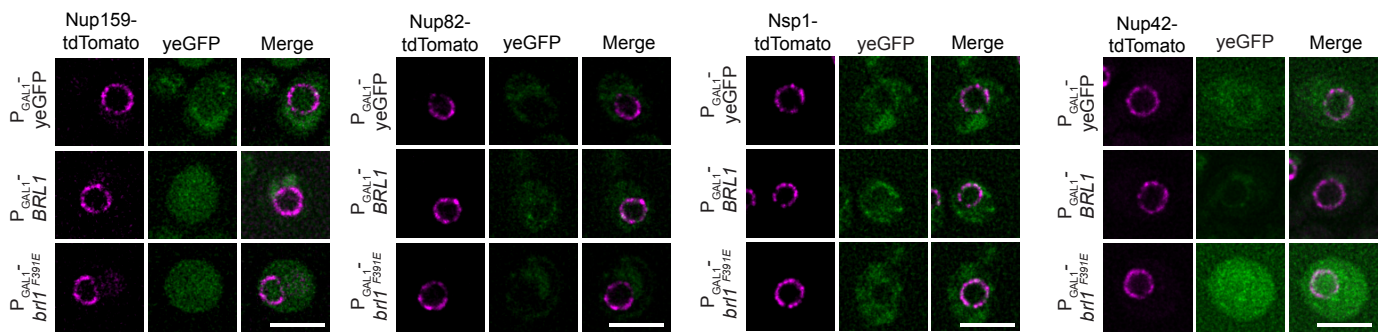

B

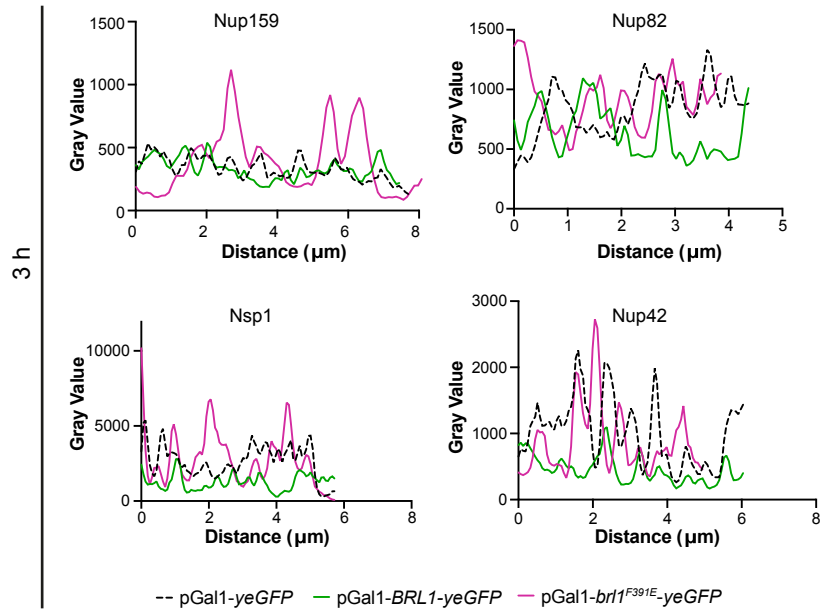

C

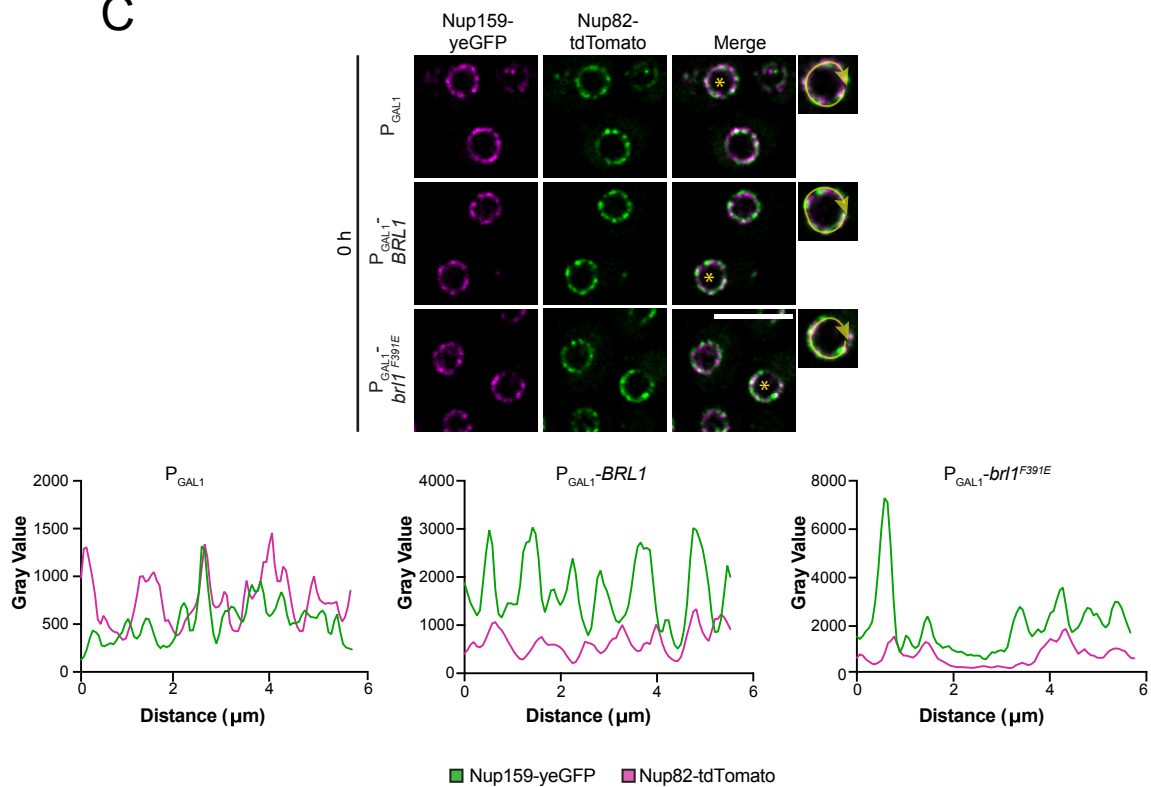

A

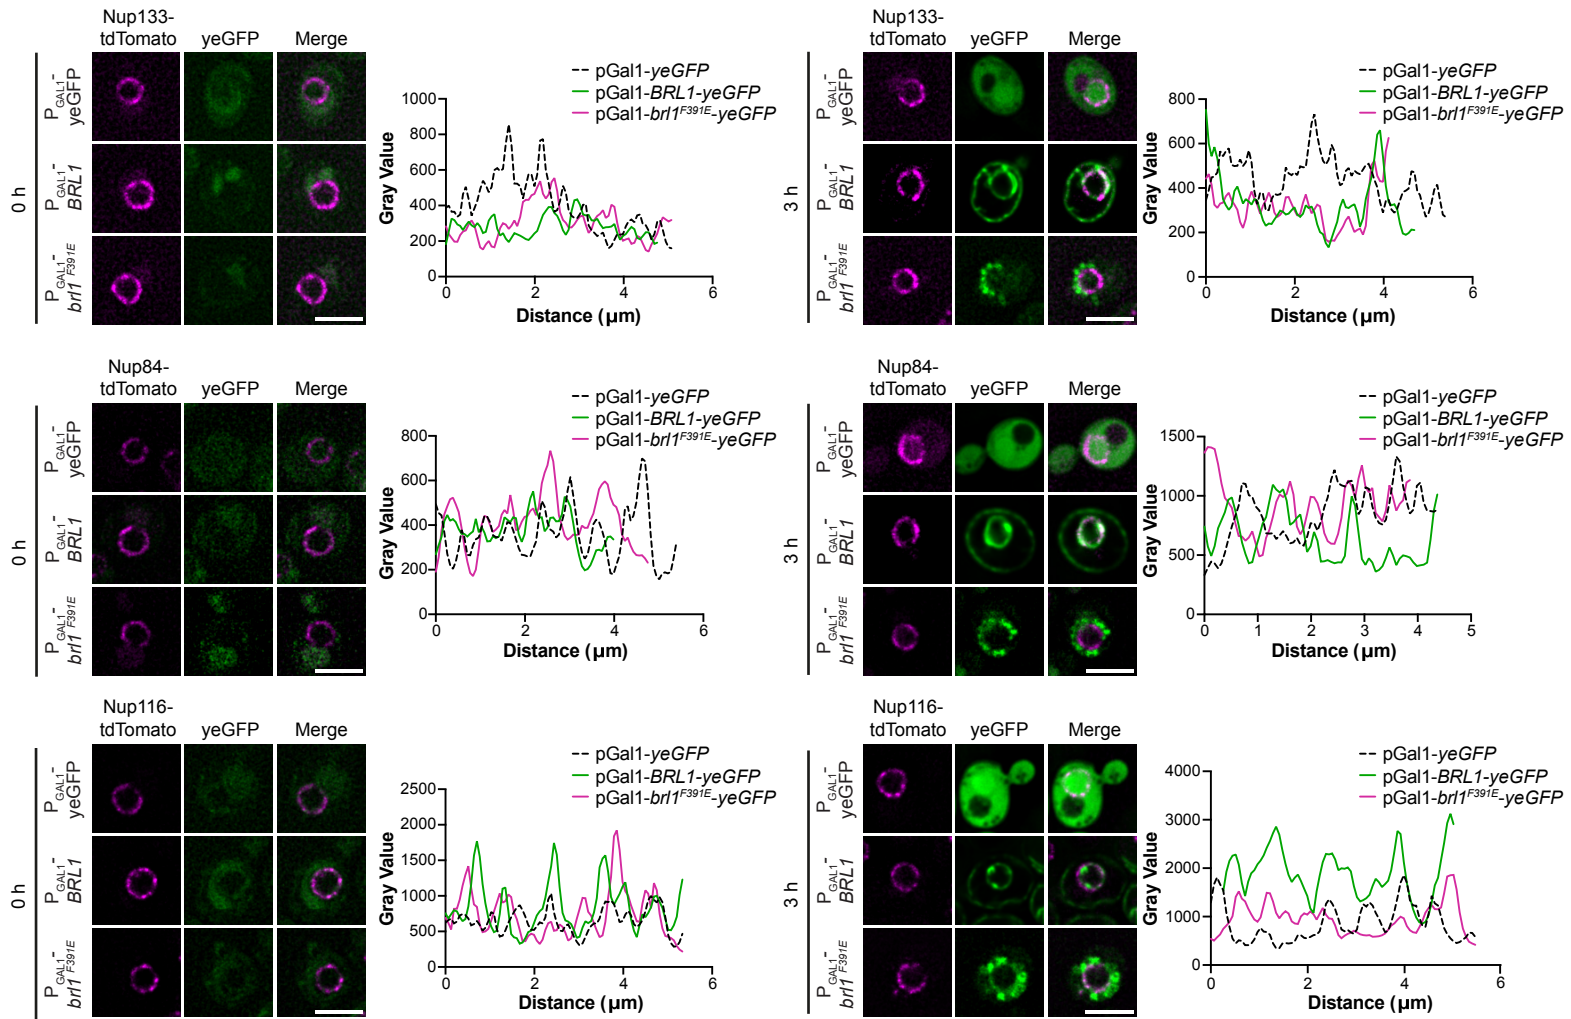

B

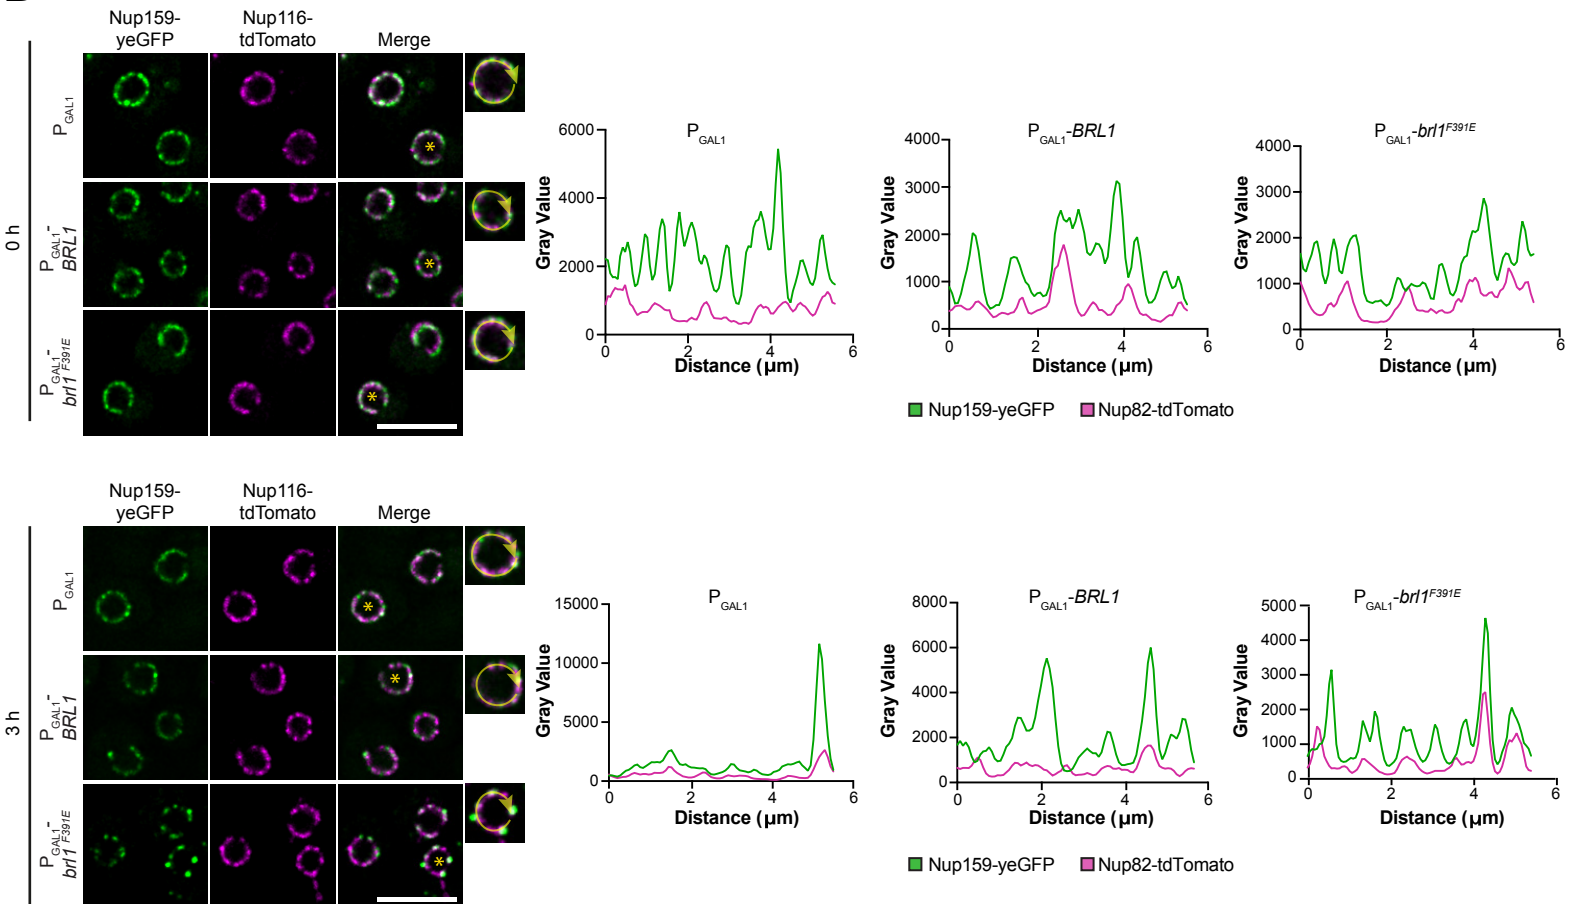



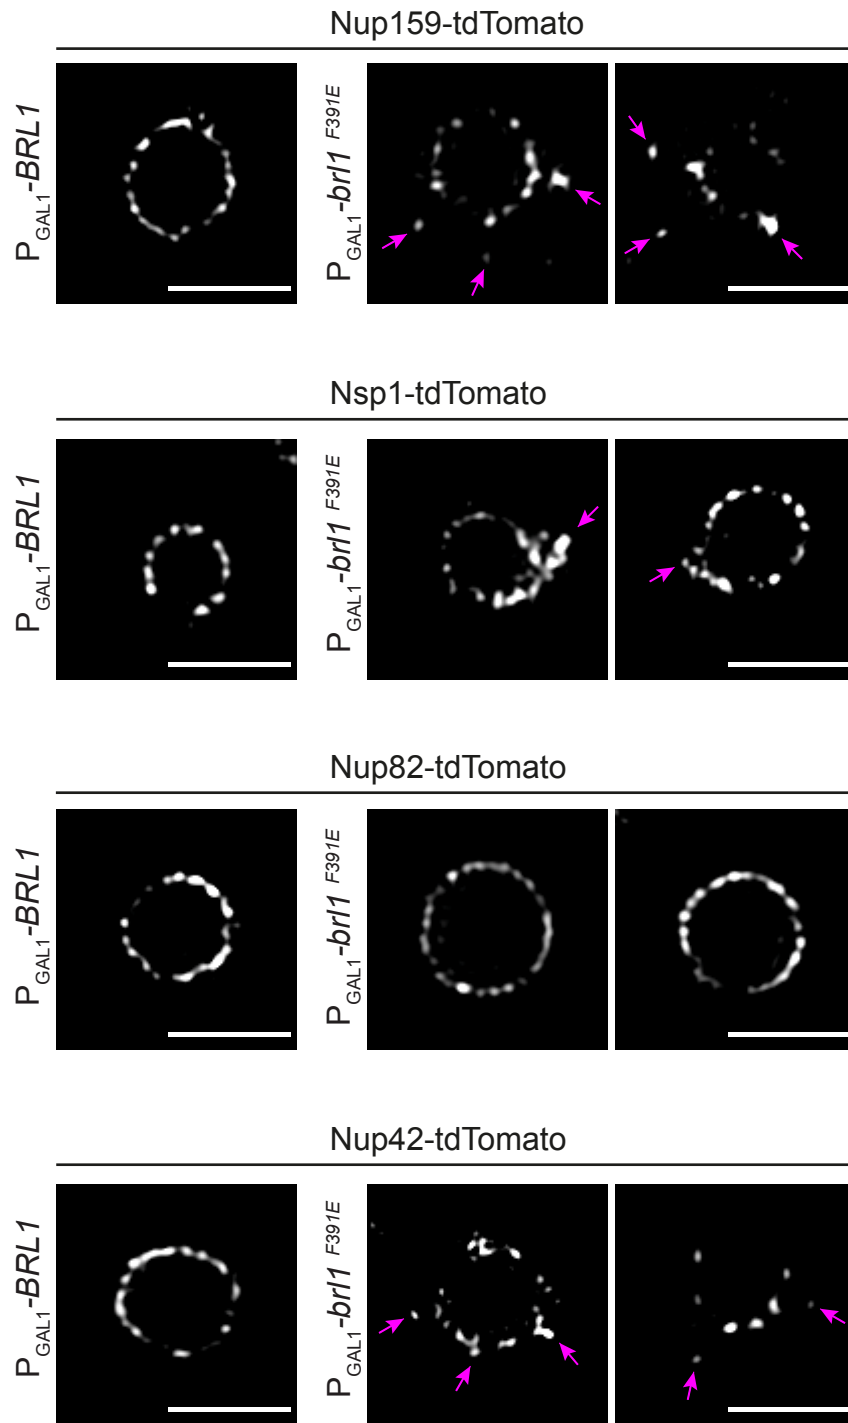

A

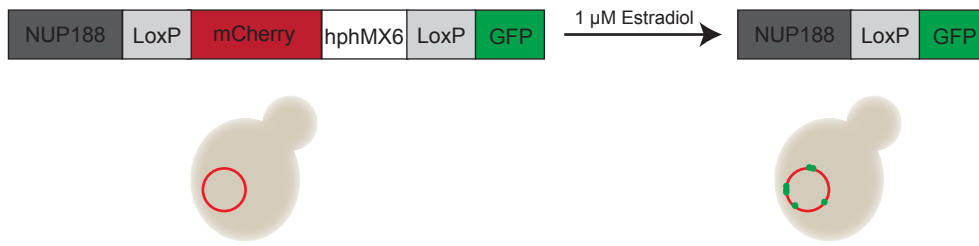

B

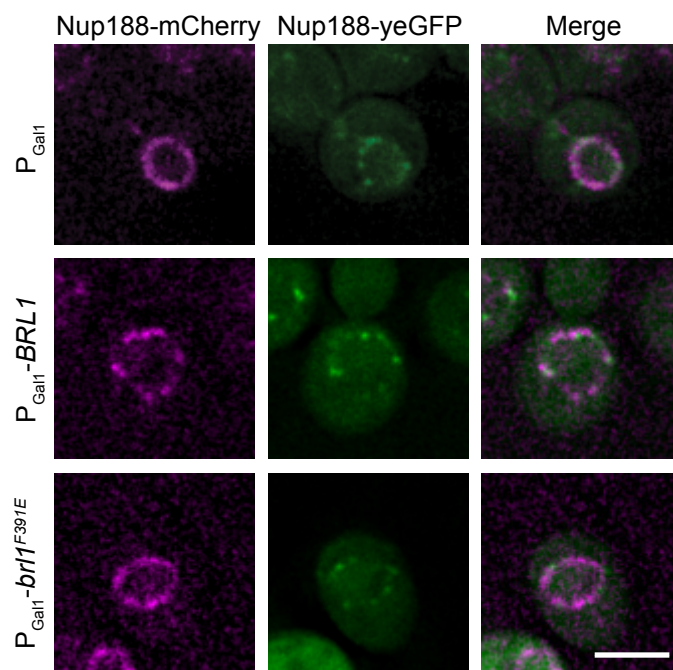

A

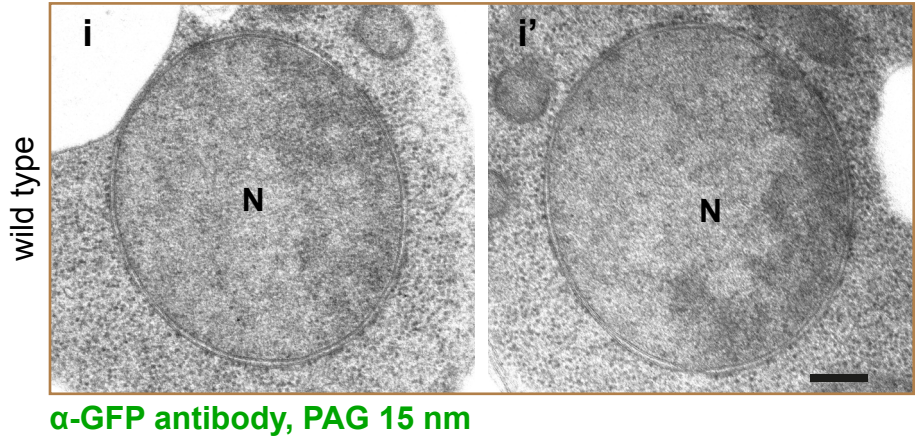

B

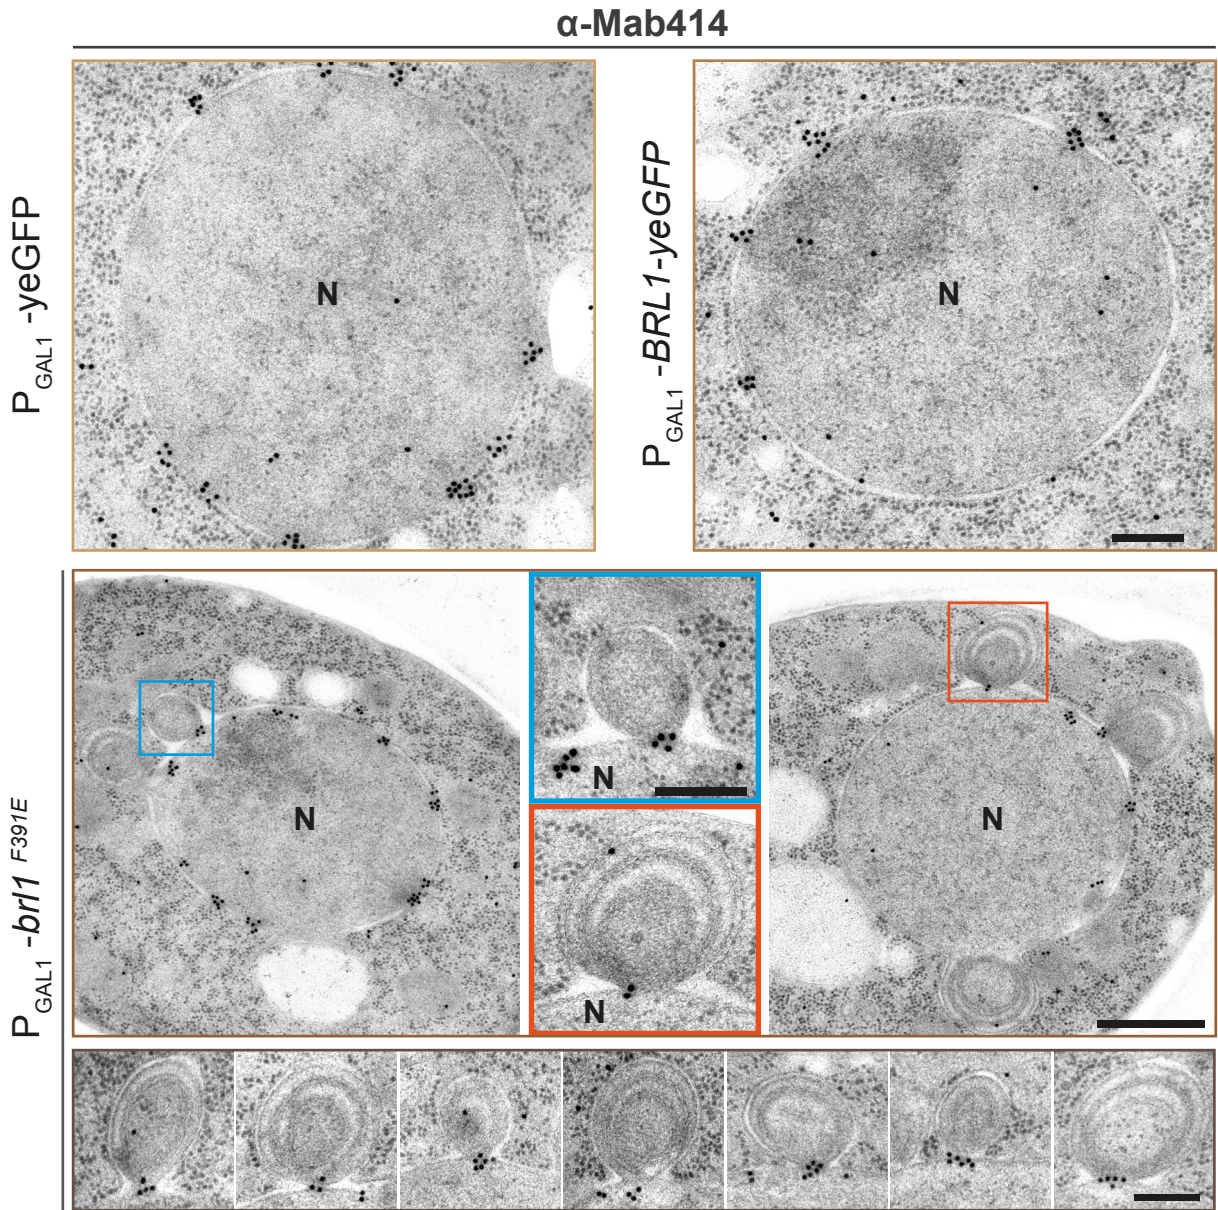

**Table S1:** Yeast strains and plasmids used in this study.

| Strain ID  | Description                                                                                                    | Source/Reference        | Figure                                          |
|------------|----------------------------------------------------------------------------------------------------------------|-------------------------|-------------------------------------------------|
|            | ESM356-1                                                                                                       |                         | Fig. 2A, B, 3A, 5A, B, C, S1A, S2A, B, D, E, S7 |
| YZW873     | <i>MATa ura3-52 leu2Δ1 his3Δ200 trp1Δ63 apq12Δ::NatNT2</i>                                                     | Zhang et al., 2021      | Fig. S1A                                        |
| YZW952     | <i>MATa ura3-52 leu2Δ1 his3Δ200 trp1Δ63 apq12-ah-NatNT2</i>                                                    | Zhang et al., 2021      | Fig. S1A                                        |
| AAK0031    | <i>MATa ura3-52 leu2Δ1 his3Δ200 trp1Δ63::YIPlac-dsRED-HDEL-NATMX Rpl25-GFP-klTRP1</i>                          | Zhang et al., 2021      | Fig. 3B                                         |
| YZW292     | <i>MATa ura3-52 leu2Δ1 his3Δ200 trp1Δ63::YIPlac-dsRED-HDEL-NatMX</i>                                           | This study              | Fig. 2C, E, S2C                                 |
| YZW320     | <i>MATa ura3-52 leu2Δ1 his3Δ200 trp1Δ63 UBR1::pGal1-HA-UBR1-His3MX6 Nup188-loxP-HA-mCherry-HphMX6-loxP-GFP</i> | Zhang et al., 2018      | Fig. S6B                                        |
| YZW769     | <i>MATa ura3-52 leu2Δ1 his3Δ200 trp1Δ63 Δnup116::HphNT1</i>                                                    | Zhang et al., 2018      | Fig. S1C                                        |
| AAK0034    | <i>brl1Δ::KAN, pRS316-BRL1, pRS303N-brl1<sup>F391E</sup></i>                                                   | This study              | Fig. 1D                                         |
| AAK0035    | <i>brl1Δ::KAN, pRS316-BRL1, pRS303N-brl1<sup>L402E</sup></i>                                                   | This study              | Fig. 1D                                         |
| AAK0036    | <i>brl1Δ::KAN, pRS316-BRL1, pRS303N</i>                                                                        | This study              | Fig. 1D                                         |
| AAK0037    | <i>brl1Δ::KAN, pRS316-BRL1, pRS315-BRL1</i>                                                                    | This study              | Fig. 1D                                         |
| AAK0041    | <i>MATa ura3-52 leu2Δ1 his3Δ200 trp1Δ63::YIPlac-GFP-HDEL-NatMX</i>                                             | This study              | Fig. 3B                                         |
| YZW14      | <i>MATa ura3-52 leu2Δ1 brr6-751</i>                                                                            | Dr. I. Hagan            | Fig. S1B                                        |
| AAK0042    | <i>MATa ura3-52 leu2Δ1 his3Δ200 trp1Δ63 NUP82-tdTomato-hph</i>                                                 | This study              | Fig. 4B, S3A                                    |
| YZW815     | <i>MATa ura3-52 leu2Δ1 his3Δ200 trp1Δ63 NSP1-tdTomato-hph</i>                                                  | This study              | Fig. 4B, S3A                                    |
| YJV075     | <i>MATa ura3-52 leu2Δ1 his3Δ200 trp1Δ63 NUP42-tdTomato-hph</i>                                                 | This study              | Fig. 4C, S3A                                    |
| YJV076     | <i>MATa ura3-52 leu2Δ1 his3Δ200 trp1Δ63 NUP159-yeGFP-TRP1 Nup82-tdTomato-hph</i>                               | This study              | Fig. 4E, S3C                                    |
| YJV075     | <i>MATa ura3-52 leu2Δ1 his3Δ200 trp1Δ63 NUP159-yeGFP-TRP1 Nup116-tdTomato-hph</i>                              | This study              | Fig. S4B                                        |
| AK723      | <i>MATa ura3-52 leu2Δ1 his3Δ200 trp1Δ63 NUP84-mCherry-KanMX6</i>                                               | This study              | Fig. S4A                                        |
| AK725      | <i>MATa ura3-52 leu2Δ1 his3Δ200 NUP133-mCherry-KanMX6</i>                                                      | This study              | Fig. S4A                                        |
| AK948      | <i>MATa ura3-52 leu2Δ1 his3Δ200 trp1Δ63 NUP159-mCherry-KanMX6</i>                                              | This study              | Fig. 4B, S3A                                    |
| Plasmid ID | Description                                                                                                    | Source/Reference        |                                                 |
|            | pFA6a-KanMX4                                                                                                   | M. Knop                 |                                                 |
| pCM45      | pFA6a-tdTomato-KanMX6                                                                                          | M. Knop                 |                                                 |
| pCM49      | pFA6a-tdTomato-hphMX6                                                                                          | M. Knop                 |                                                 |
| pYM25      | yeGFP-hphNT1                                                                                                   | Janke et al., 2004 [48] |                                                 |
| pZW111     | p426Gal-APQ12-6His                                                                                             | This study              |                                                 |
| pZW112     | p425Gal-apq12-ah-6His                                                                                          | This study              |                                                 |
| pAAK0012   | pRS303N-brl1 <sup>F391E</sup>                                                                                  | This study              |                                                 |
| pAAK0013   | pRS303N-brl1 <sup>L402E</sup>                                                                                  | This study              |                                                 |
| pAAK0014   | p425Gal-brl1 <sup>F391E</sup>                                                                                  | This study              |                                                 |
| pAAK0015   | p425Gal-brl1 <sup>L402E</sup>                                                                                  | This study              |                                                 |
| pAAK0016   | p426Gal1-brl1 <sup>F391E</sup> -yeGFP                                                                          | This study              |                                                 |
| pAAK0019   | p426Gal1-brl1 <sup>F391E</sup> C365S C371S                                                                     | This study              |                                                 |

|          |                                              |            |  |
|----------|----------------------------------------------|------------|--|
| pJV034   | p426Gal1- <i>brl1</i> <sup>N353D</sup>       | This study |  |
| pJV035   | p426Gal1- <i>brl1</i> <sup>T355A</sup>       | This study |  |
| pJV036   | p426Gal1- <i>brl1</i> <sup>P355G</sup>       | This study |  |
| pJV037   | p426Gal1- <i>brl1</i> <sup>F391E N353D</sup> | This study |  |
| pJV038   | p426Gal1- <i>brl1</i> <sup>F391E T355A</sup> | This study |  |
| pJV039   | p426Gal1- <i>brl1</i> <sup>F391E P355G</sup> | This study |  |
| pZW78    | p426Gal1-BRL1                                | This study |  |
| pKW1219  | pRS425-NLS-mRFP1                             | K. Weis    |  |
| pAAK0020 | p426Gal1- <i>brl1</i> <sup>F391P</sup>       | This study |  |
| pAAK0018 | p426Gal1- <i>brl1</i> <sup>C365S C371S</sup> | This study |  |
| pAAK0021 | p426Gal1- <i>brl1</i> <sup>C343Y</sup>       | This study |  |
| pAAK0022 | p426Gal1- <i>brl1</i> <sup>C343Y F391E</sup> | This study |  |
| pAAK0027 | p426Gal1- <i>brl1</i> <sup>A360D</sup>       | This study |  |
| pAAK0028 | p426Gal1- <i>brl1</i> <sup>A360D F391E</sup> | This study |  |
| pAAK0025 | p426Gal1- <i>brl1</i> <sup>Y347H</sup>       | This study |  |
| pAAK0026 | p426Gal1- <i>brl1</i> <sup>Y347H F391E</sup> | This study |  |
| pAAK0029 | p426Gal1- <i>brl1</i> <sup>W368Y</sup>       | This study |  |
| pAAK0030 | p426Gal1- <i>brl1</i> <sup>W368Y F391E</sup> | This study |  |
| pJV046   | pRS315- <i>brl1</i> <sup>F391P</sup>         | This study |  |
| pJV047   | pRS315- <i>brl1</i> <sup>C343Y</sup>         | This study |  |
| pAAK0031 | pRS315- <i>brl1</i> <sup>C365S C371S</sup>   | This study |  |
| pJV044   | pRS315- <i>brl1</i> <sup>Y347H</sup>         | This study |  |
| pJV045   | pRS315- <i>brl1</i> <sup>A360D</sup>         | This study |  |
| pJV043   | pRS315- <i>brl1</i> <sup>W368Y</sup>         | This study |  |
| pJV040   | pRS315- <i>brl1</i> <sup>N353D</sup>         | This study |  |
| pJV041   | pRS315- <i>brl1</i> <sup>T355A</sup>         | This study |  |
| pJV042   | pRS315- <i>brl1</i> <sup>P356G</sup>         | This study |  |
